# Supplementary material
Source: MDPI journal article supplement (https://www.mdpi.com/2624-795X/4/2/12)
Supplement: s1 [file s1 › geohazards-2335412-supplementary.pdf]

## Supplementary Material

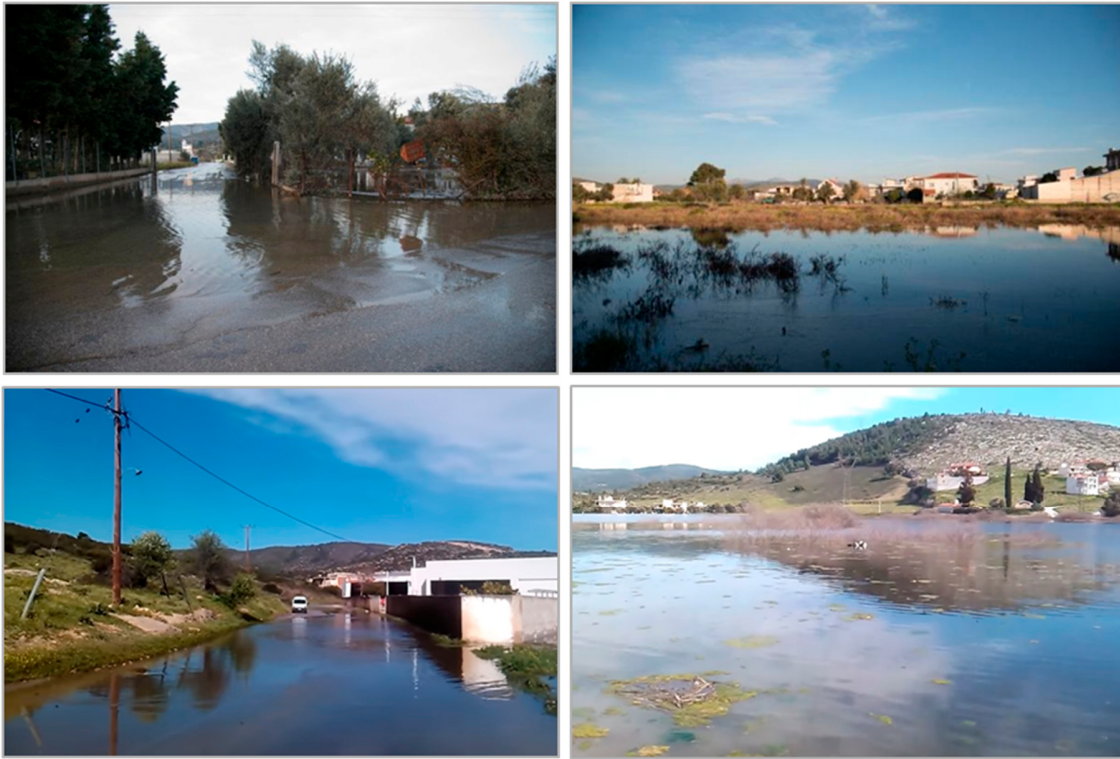

**Figure 1.** Photographs showing the 2019 flooding event that hit Dokos [104,105].

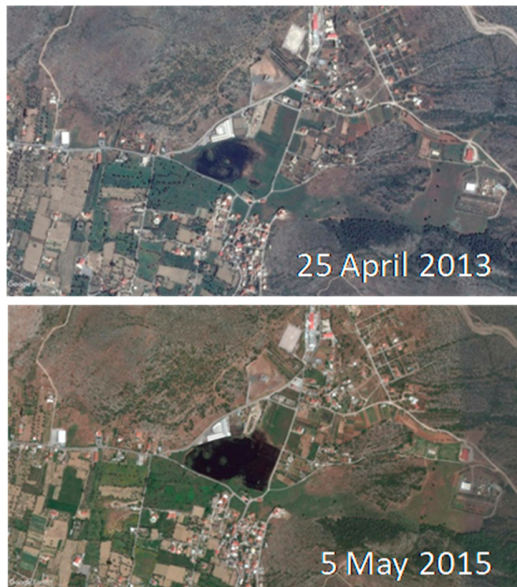

**Figure 2.** Past water fluctuations in Dokos from Google Earth.

### Optical Processing

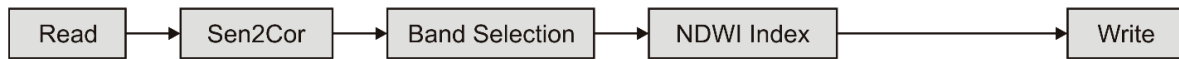

### SAR Processing

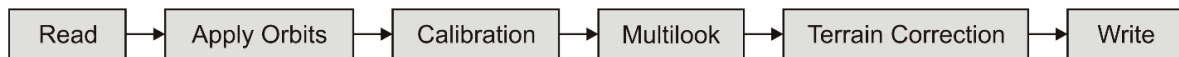

**Figure S3.** Schematic diagram showing SAR and optical processing adopted for Sentinel-1 GRD and Sentinel-2 L1C data.

### References

104. TANEIA. Flood in Chalkida (tanea.gr). <https://www.tanea.gr/2019/03/06/greece/i-plimmyra-sti-xalkida-se-eikones/> (accessed on 20 February 2023)
105. EVIAZOOM. Chalkida floods. <https://www.eviazoom.gr/2019/03/plummires-xalkida-paramenei-aperanti-limni-o-dokos.html> (accessed on 20 February 2023)
